# Supplementary material for: Reproduction predicts shorter telomeres and epigenetic age acceleration among young adult women
Source: PubMed Central journal article supplement (PMC6056536; doi:10.1038/s41598-018-29486-4), 2018-07-23
Supplement: 41598_2018_29486_MOESM1_ESM.pdf [file 41598_2018_29486_MOESM1_ESM.pdf]

1 **Reproduction predicts shorter telomeres and epigenetic age acceleration**  
 2 **among young adult women**

3 Calen P. Ryan<sup>a,1\*</sup>, M. Geoffrey Hayes<sup>b,c,d</sup>, Nanette R. Lee<sup>e,f</sup>, Thomas W. McDade<sup>a,g,h</sup>, Meaghan J.  
 4 Jones<sup>i</sup>, Michael S. Kobor<sup>h,i</sup>, Christopher W. Kuzawa<sup>a,g</sup>, Dan T.A. Eisenberg<sup>j,k,1\*</sup>,

5 <sup>a</sup>Department of Anthropology, Northwestern University, Evanston, IL 60208; <sup>b</sup>Division of  
 6 Endocrinology, Metabolism and Molecular Medicine, Department of Medicine, Northwestern University,  
 7 Feinberg School of Medicine, Chicago, IL 60611; <sup>c</sup>Division of Endocrinology, Metabolism and  
 8 Molecular Medicine, Department of Medicine, Northwestern University Feinberg School of Medicine,  
 9 Chicago, IL 60611; <sup>d</sup>Center for Genetic Medicine, Northwestern University Feinberg School of Medicine,  
 10 Chicago, IL 60611; <sup>e</sup>Office of Population Studies Foundation Inc., Cebu City, Philippines; <sup>f</sup>Department of  
 11 Anthropology, Sociology, and History, University of San Carlos, Cebu City, Philippines; <sup>g</sup>Institute for  
 12 Policy Research, Northwestern University, Evanston, IL 60208; <sup>h</sup>Child and Brain Development Program,  
 13 Canadian Institute for Advanced Research, Toronto, ON, Canada, M5G 1Z8; <sup>i</sup>BC Children’s Hospital  
 14 Research Institute, University of British Columbia, Vancouver, BC, Canada, V5Z 4H4; <sup>j</sup>Department of  
 15 Anthropology, University of Washington, Seattle, WA 98195; <sup>k</sup>Center for Studies in Demography and  
 16 Ecology, University of Washington, Seattle, WA 98195;

17

18 **Supplementary Notes:**

19 **Comparison of TL across ethnicities.** qPCR measured TL does not permit comparisons across  
 20 populations, but 190 samples from the population for which the samples from this paper come  
 21 from have had southern blot TL measured<sup>1</sup>. The average age of this sample is 35.96 ( $\pm$  15.83,  
 22 range 21.02-68.33), with an average TL of 7.86 kb ( $\pm$  0.76), and an estimated age related decline  
 23 in TL of 21.98 bp/year (95% CI 15.81-28.15). This age related decline is non-significantly less  
 24 than that found in other populations (African=27.7 bp/year; African Americans = 25.6 bp/year;  
 25 Europeans = 27.3 bp/year)<sup>2</sup>. These three populations from Hansen et al. (2016) have an average  
 26 age of 43.25. Adjusting the Cebu population TL for the 7.29 years younger they are by assuming  
 27 the observed 21.98 bp/year attrition rates yields an interpolated TL of 7.70 kb if the mean age  
 28 was 43.25, the same age as the samples in Hansen et al. (2016). This suggests that the TL in  
 29 Cebu is longer than that of European and African Americans, but slightly shorter than that of  
 30 Africans.

| <b>Ethnicity (N)</b>    | <b>% Female</b> | <b>Age (years)</b> | <b>LTL (kb)</b>   |
|-------------------------|-----------------|--------------------|-------------------|
| Europeans (90)*         | 63.3            | 43.9 (18-78)       | 7.21 (5.39-9.42)  |
| African Americans (97)* | 67.1            | 42.9 (21-79)       | 7.45 (5.55-9.16)  |
| Africans (100)*         | 68.0            | 43.0 (18-79)       | 7.85 (5.64-10.13) |
| Cebu, Philippines (190) | 50.3            | 43.3~              | 7.70 (6.10-9.21)  |

31 \* from Hansen MEB, et al. (2016) Shorter telomere length in Europeans than in Africans due to polygenetic  
 32 adaptation. *Human Molecular Genetics*.

33 †from Eisenberg DT, Kuzawa CW, Hayes MG (2015) Improving qPCR telomere length assays: Controlling for well  
 34 position effects increases statistical power. *Am J Hum Biol* 27(4):570–5.

35 ~ interpolated to match mean age of other populations - see above text

1 **Calculations for the effect of parity on telomere aging (in years):**

2 Each additional pregnancy was associated with a reduction in TL of 0.016 units (Table 2, Model  
3 3), or an interpolated -50.6 bp/pregnancy based on previous southern blot measured TL in a  
4 subset of these samples<sup>2</sup>. The age related decline in TL in 36-69 year old women in this  
5 population was previously found to be 0.0043 relative TL units/year (n=1,845, p=7.19 x 10<sup>-16</sup>)<sup>3</sup> or  
6 13.6 bp/year, while the age related decline in TL within the younger and narrow age range in this  
7 sample is estimated between -0.027 and -0.047/year (Table 2, Models 1-4). In other populations  
8 the age-related decline in mid-late adulthood is approximately 25 bp/year<sup>2</sup>. This implies that one  
9 pregnancy is equivalent to between 0.34 and 3.72 years of telomere aging depending on the  
10 comparison population. Consistent with this calculation, each additional pregnancy was  
11 associated with 0.44-year (0.27 to 0.61 years) increase in DNAmAge acceleration (Table 2,  
12 Model 7).

Table S1: Full model estimates for the effect of parity on telomere length (1-4) and DNAmAge (5-8) among young women in the Philippines.

|                                 | Telomere Length  |                  |                  |                  | DNAmAge          |                  |                  |                  |
|---------------------------------|------------------|------------------|------------------|------------------|------------------|------------------|------------------|------------------|
|                                 | (1)              | (2)              | (3)              | (4)              | (5)              | (6)              | (7)              | (8)              |
| <b>Age</b>                      | -0.047           | -0.029           | -0.028           | -0.029           | 0.485            | 0.667            | 0.656            | 0.645            |
|                                 | $p = 0.003^{**}$ | $p = 0.071^+$    | $p = 0.073^+$    | $p = 0.068^+$    | $p = 0.293$      | $p = 0.157$      | $p = 0.158$      | $p = 0.165$      |
| <b>No.Pregnancies</b>           | -0.014           | -0.013           | -0.014           | -0.016           | 0.363            | 0.326            | 0.459            | 0.510            |
|                                 | $p = 0.025^*$    | $p = 0.039^*$    | $p = 0.031^*$    | $p = 0.020^*$    | $p = 0.026^*$    | $p = 0.049^*$    | $p = 0.007^{**}$ | $p = 0.005^{**}$ |
| <b>PC1</b>                      |                  | -0.419           | -0.418           | -0.419           |                  | -11.623          | -11.250          | -11.219          |
|                                 |                  | $p = 0.065^+$    | $p = 0.066^+$    | $p = 0.066^+$    |                  | $p = 0.084^+$    | $p = 0.090^+$    | $p = 0.091^+$    |
| <b>PC2</b>                      |                  | -0.154           | -0.155           | -0.143           |                  | 5.098            | 4.793            | 4.341            |
|                                 |                  | $p = 0.501$      | $p = 0.499$      | $p = 0.535$      |                  | $p = 0.458$      | $p = 0.480$      | $p = 0.523$      |
| <b>PC3</b>                      |                  | 0.005            | 0.001            | 0.007            |                  | 8.510            | 10.074           | 9.856            |
|                                 |                  | $p = 0.984$      | $p = 0.996$      | $p = 0.975$      |                  | $p = 0.202$      | $p = 0.127$      | $p = 0.136$      |
| <b>PC4</b>                      |                  | -0.030           | -0.026           | -0.033           |                  | 11.991           | 10.450           | 10.511           |
|                                 |                  | $p = 0.894$      | $p = 0.909$      | $p = 0.883$      |                  | $p = 0.069^+$    | $p = 0.109$      | $p = 0.107$      |
| <b>PC5</b>                      |                  | -0.235           | -0.237           | -0.231           |                  | -14.123          | -14.033          | -13.766          |
|                                 |                  | $p = 0.312$      | $p = 0.308$      | $p = 0.321$      |                  | $p = 0.023^*$    | $p = 0.022^*$    | $p = 0.025^*$    |
| <b>PC6</b>                      |                  | -0.294           | -0.301           | -0.291           |                  | -4.002           | -1.683           | -2.286           |
|                                 |                  | $p = 0.204$      | $p = 0.194$      | $p = 0.211$      |                  | $p = 0.548$      | $p = 0.799$      | $p = 0.731$      |
| <b>PC7</b>                      |                  | -0.506           | -0.515           | -0.517           |                  | 18.513           | 21.220           | 21.471           |
|                                 |                  | $p = 0.031^*$    | $p = 0.029^*$    | $p = 0.028^*$    |                  | $p = 0.008^{**}$ | $p = 0.003^{**}$ | $p = 0.002^{**}$ |
| <b>PC8</b>                      |                  | 0.421            | 0.421            | 0.425            |                  | 3.987            | 3.930            | 3.829            |
|                                 |                  | $p = 0.067^+$    | $p = 0.067^+$    | $p = 0.064^+$    |                  | $p = 0.534$      | $p = 0.535$      | $p = 0.545$      |
| <b>PC9</b>                      |                  | -0.462           | -0.460           | -0.465           |                  | -1.730           | -2.332           | -2.337           |
|                                 |                  | $p = 0.040^*$    | $p = 0.041^*$    | $p = 0.039^*$    |                  | $p = 0.789$      | $p = 0.715$      | $p = 0.714$      |
| <b>PC10</b>                     |                  | 0.555            | 0.551            | 0.544            |                  | -2.701           | -1.329           | -1.043           |
|                                 |                  | $p = 0.021^*$    | $p = 0.022^*$    | $p = 0.023^*$    |                  | $p = 0.690$      | $p = 0.843$      | $p = 0.876$      |
| <b>SES-score</b>                |                  | -0.006           | -0.006           | -0.004           |                  | -0.180           | -0.214           | -0.291           |
|                                 |                  | $p = 0.143$      | $p = 0.161$      | $p = 0.395$      |                  | $p = 0.146$      | $p = 0.081^+$    | $p = 0.055^+$    |
| <b>Urbanicity-score</b>         |                  | 0.002            | 0.002            | 0.002            |                  | 0.015            | 0.017            | 0.017            |
|                                 |                  | $p < 0.001^{**}$ | $p < 0.001^{**}$ | $p < 0.001^{**}$ |                  | $p = 0.270$      | $p = 0.213$      | $p = 0.226$      |
| <b>Currently Pregnancy (Y)</b>  |                  |                  | 0.011            | 0.011            |                  |                  | -1.472           | -1.460           |
|                                 |                  |                  | $p = 0.534$      | $p = 0.540$      |                  |                  | $p = 0.001^{**}$ | $p = 0.001^{**}$ |
| <b>No.Pregnancies*SES-score</b> |                  |                  |                  | -0.004           |                  |                  |                  | 0.106            |
|                                 |                  |                  |                  | $p = 0.362$      |                  |                  |                  | $p = 0.385$      |
| <b>Intercept</b>                | 1.826            | 1.337            | 1.332            | 1.343            | 14.818           | 10.319           | 10.611           | 10.850           |
|                                 | $p < 0.001^{**}$ | $p < 0.001^{**}$ | $p < 0.001^{**}$ | $p < 0.001^{**}$ | $p = 0.138$      | $p = 0.318$      | $p = 0.297$      | $p = 0.287$      |
| Observations                    | 821              | 821              | 821              | 821              | 397              | 397              | 397              | 397              |
| R <sup>2</sup>                  | 0.018            | 0.079            | 0.079            | 0.080            | 0.016            | 0.075            | 0.103            | 0.104            |
| Adjusted R <sup>2</sup>         | 0.015            | 0.063            | 0.062            | 0.062            | 0.011            | 0.041            | 0.067            | 0.067            |
| Residual Std. Error             | 0.161 (df = 818) | 0.157 (df = 806) | 0.157 (df = 805) | 0.157 (df = 804) | 3.165 (df = 394) | 3.117 (df = 382) | 3.074 (df = 381) | 3.075 (df = 380) |
| F Statistic                     | 7.347**          | 4.929**          | 4.623**          | 4.385**          | 3.220*           | 2.214**          | 2.902**          | 2.766**          |
|                                 | (df = 2; 818)    | (df = 14; 806)   | (df = 15; 805)   | (df = 16; 804)   | (df = 2; 394)    | (df = 14; 382)   | (df = 15; 381)   | (df = 16; 380)   |

*Note:*

+p<0.1; \*p<0.05; \*\*p<0.01; \*\*\*p<0.001

1 **References**

- 2 1. Eisenberg DT, Kuzawa CW, Hayes MG. Improving qPCR telomere length assays: Controlling  
3 for well position effects increases statistical power. *Am J Hum Biol*, 2015, 27:570–5
- 4 2. Hansen MEB, Hunt SC, Stone RC, Horvath K, Herbig U, Ranciaro A, Hirbo J, Beggs W,  
5 Reiner AP, Wilson JG, Kimura M, De Vivo I, Chen MM, Kark JD, Levy D, Nyambo T,  
6 Tishkoff SA, Aviv A. Shorter telomere length in Europeans than in Africans due to  
7 polygenetic adaptation. *Hum Mol Genet*, 2016
- 8 3. Eisenberg DT, Hayes MG, Kuzawa CW. Delayed paternal age of reproduction in humans is  
9 associated with longer telomeres across two generations of descendants. *Proc Natl Acad Sci*,  
10 2012, 109:10251–6  
11
